# Supplementary material for: Generation of Unique Poliovirus RNA Replication Organelles
Source: PubMed Central journal article supplement — mBio. 2014 Feb 25;5(2):e00833-13. doi: 10.1128/mBio.00833-13 (PMC3940031; doi:10.1128/mbio.00833-13), 2014-02-25
Supplement: mbo001141751sf01.pdf [file mbo001141751sf01.pdf]

Figure S1.

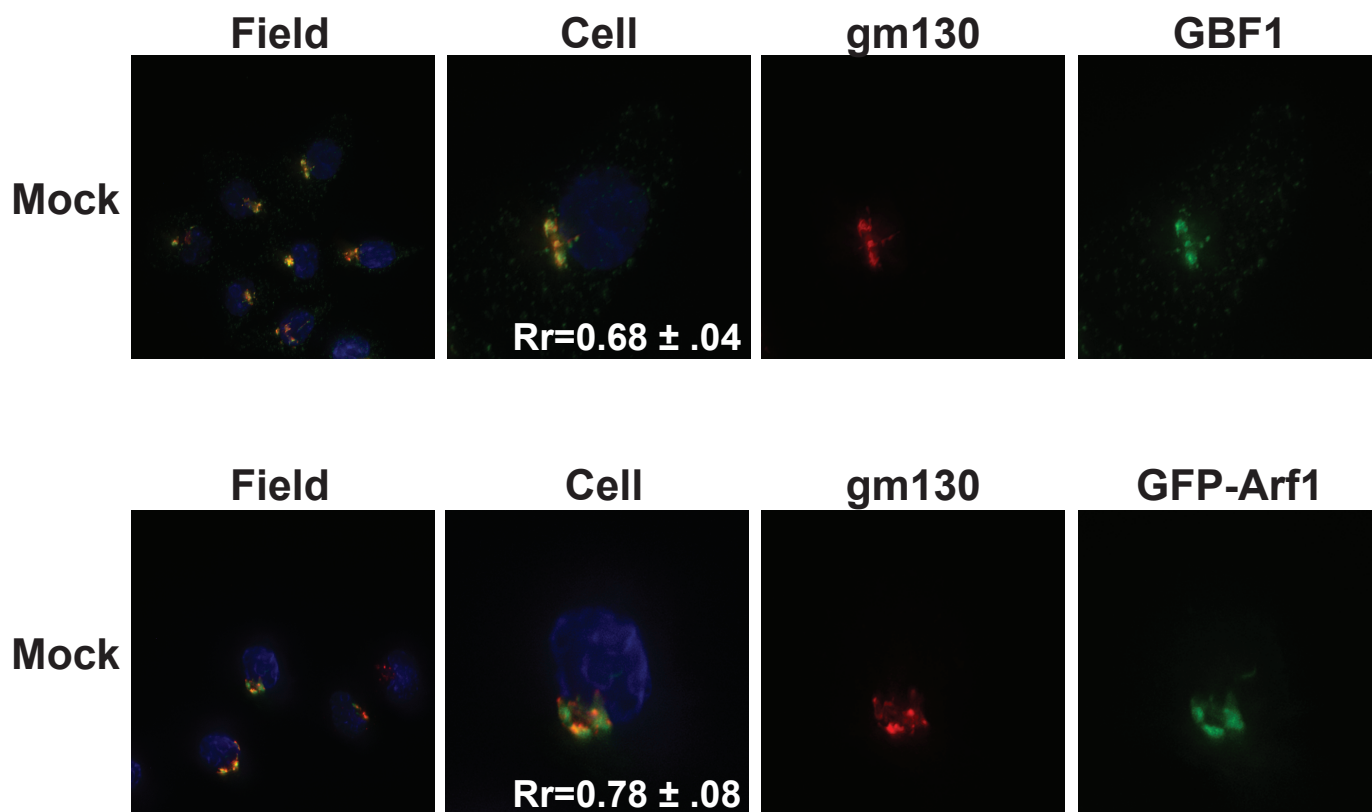

**Figure S1. Co-localization of GBF1 and GM130 in uninfected cells.** H1-Hela cells were mock-infected, fixed and permeabilized with  $-20^{\circ}\text{C}$  Methanol at 6h post-infection. Cells were stained with both with a monoclonal antibody against the Golgi protein GM130 and a polyclonal antibody against the endogenous GBF1.
