# Supplementary material for: Generation of Unique Poliovirus RNA Replication Organelles
Source: PubMed Central journal article supplement — mBio. 2014 Feb 25;5(2):e00833-13. doi: 10.1128/mBio.00833-13 (PMC3940031; doi:10.1128/mbio.00833-13), 2014-02-25
Supplement: mbo001141751sf02.pdf [file mbo001141751sf02.pdf]

**Figure S2.**

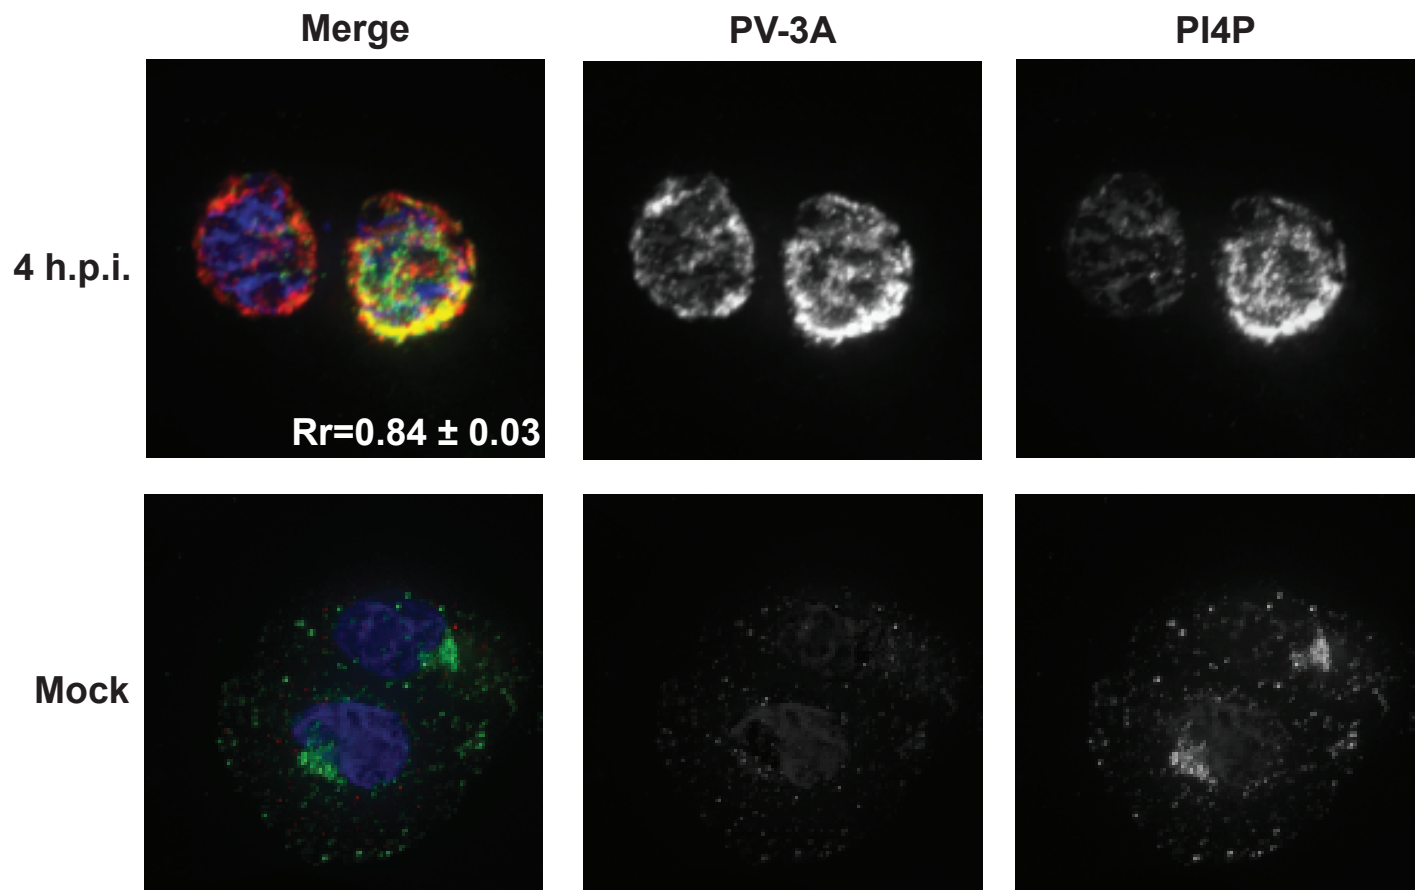

**Figure S2. PV-3A co-localizes with phosphatidylinositol-4-phosphate (PI4P) during PV infection.** H1-Hela cells were infected at an MOI of 50 pfu/cell, fixed and permeabilized with  $-20^{\circ}\text{C}$  Methanol at the indicated times post-infection. Cells were stained with both with a monoclonal antibody against PI4P and a polyclonal antibody against the poliovirus 3A protein.
