# Supplementary material for: Generation of Unique Poliovirus RNA Replication Organelles
Source: PubMed Central journal article supplement — mBio. 2014 Feb 25;5(2):e00833-13. doi: 10.1128/mBio.00833-13 (PMC3940031; doi:10.1128/mbio.00833-13), 2014-02-25
Supplement: mbo001141751sf03.pdf [file mbo001141751sf03.pdf]

**Figure S3.**

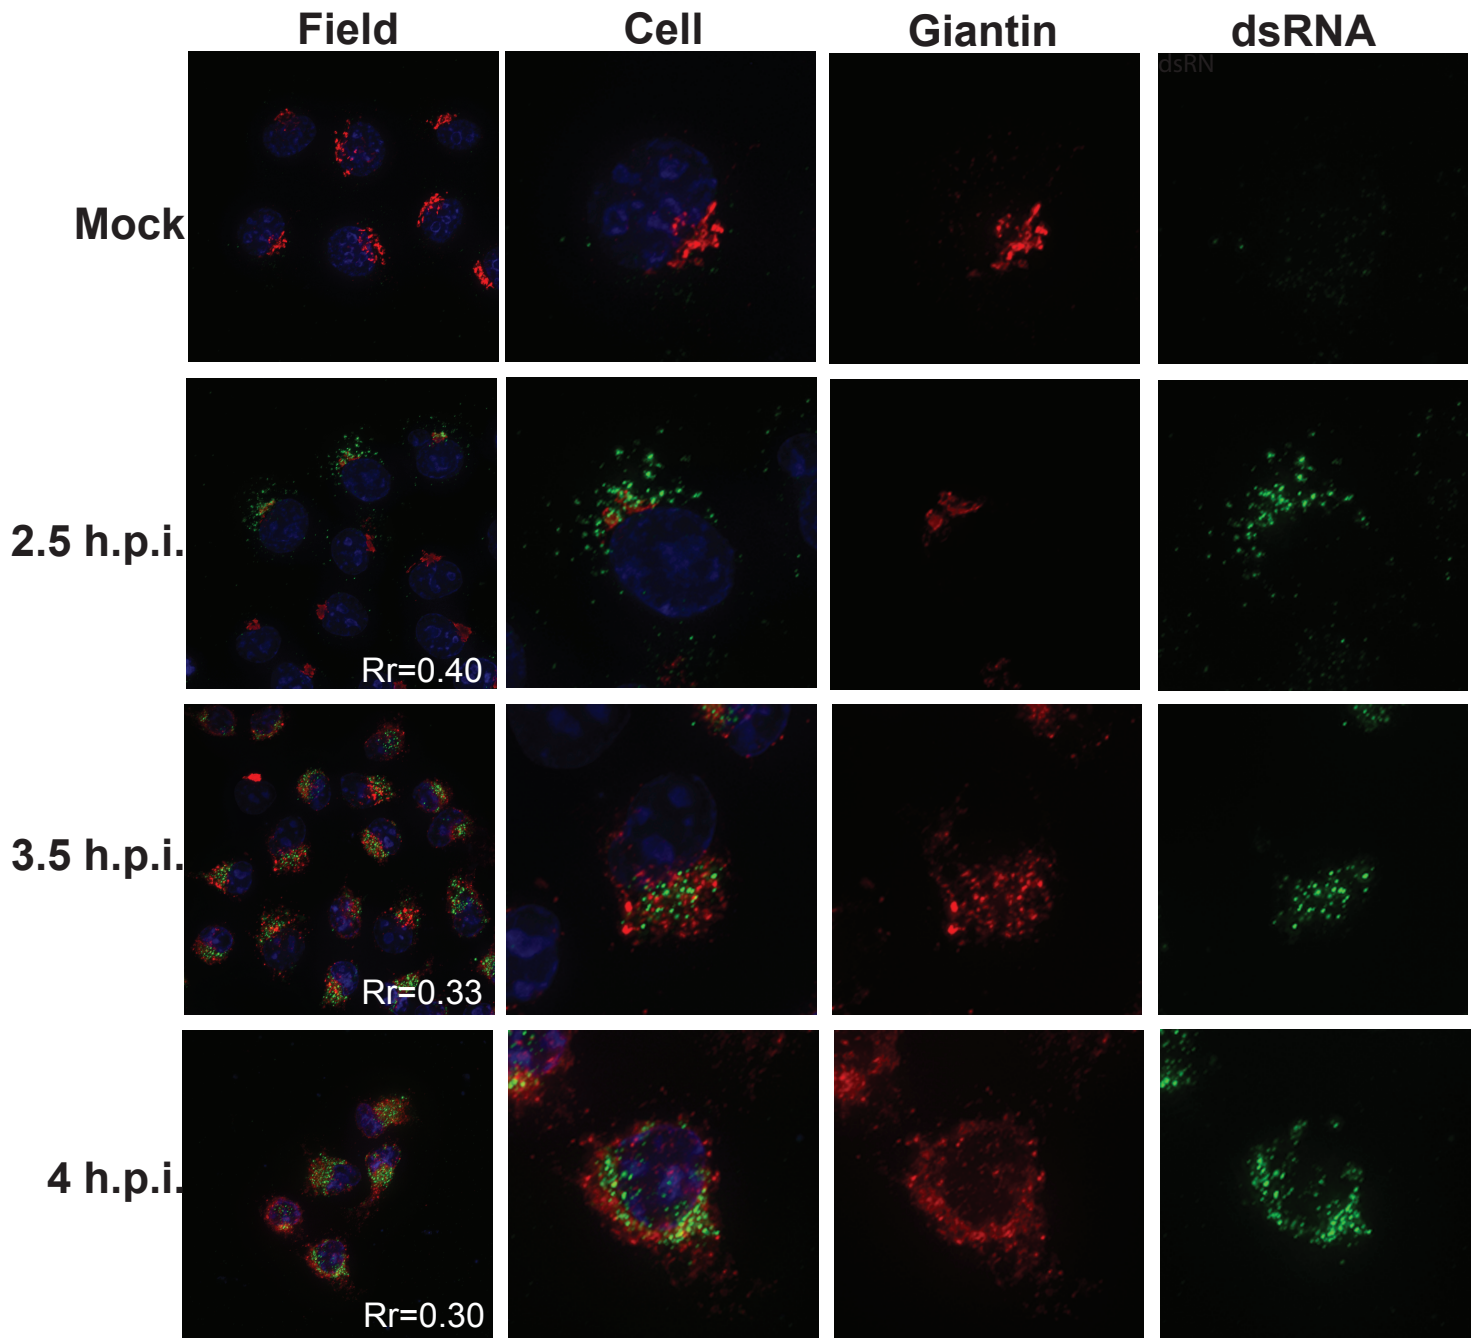

**Figure S3. dsRNA does not co-localize with the Golgi marker Giantin.** H1-Hela cells were infected at an MOI of 50 or mock-infected, then fixed and permeabilized with  $-20^{\circ}\text{C}$  Methanol at the indicated times post-infection. Cells were stained using a monoclonal antibody against dsRNA and a polyclonal antibody against the Golgi protein Giantin.
