# Supplementary material for: Generation of Unique Poliovirus RNA Replication Organelles
Source: PubMed Central journal article supplement — mBio. 2014 Feb 25;5(2):e00833-13. doi: 10.1128/mBio.00833-13 (PMC3940031; doi:10.1128/mbio.00833-13), 2014-02-25
Supplement: mbo001141751sf04.pdf [file mbo001141751sf04.pdf]

**Figure S4.**

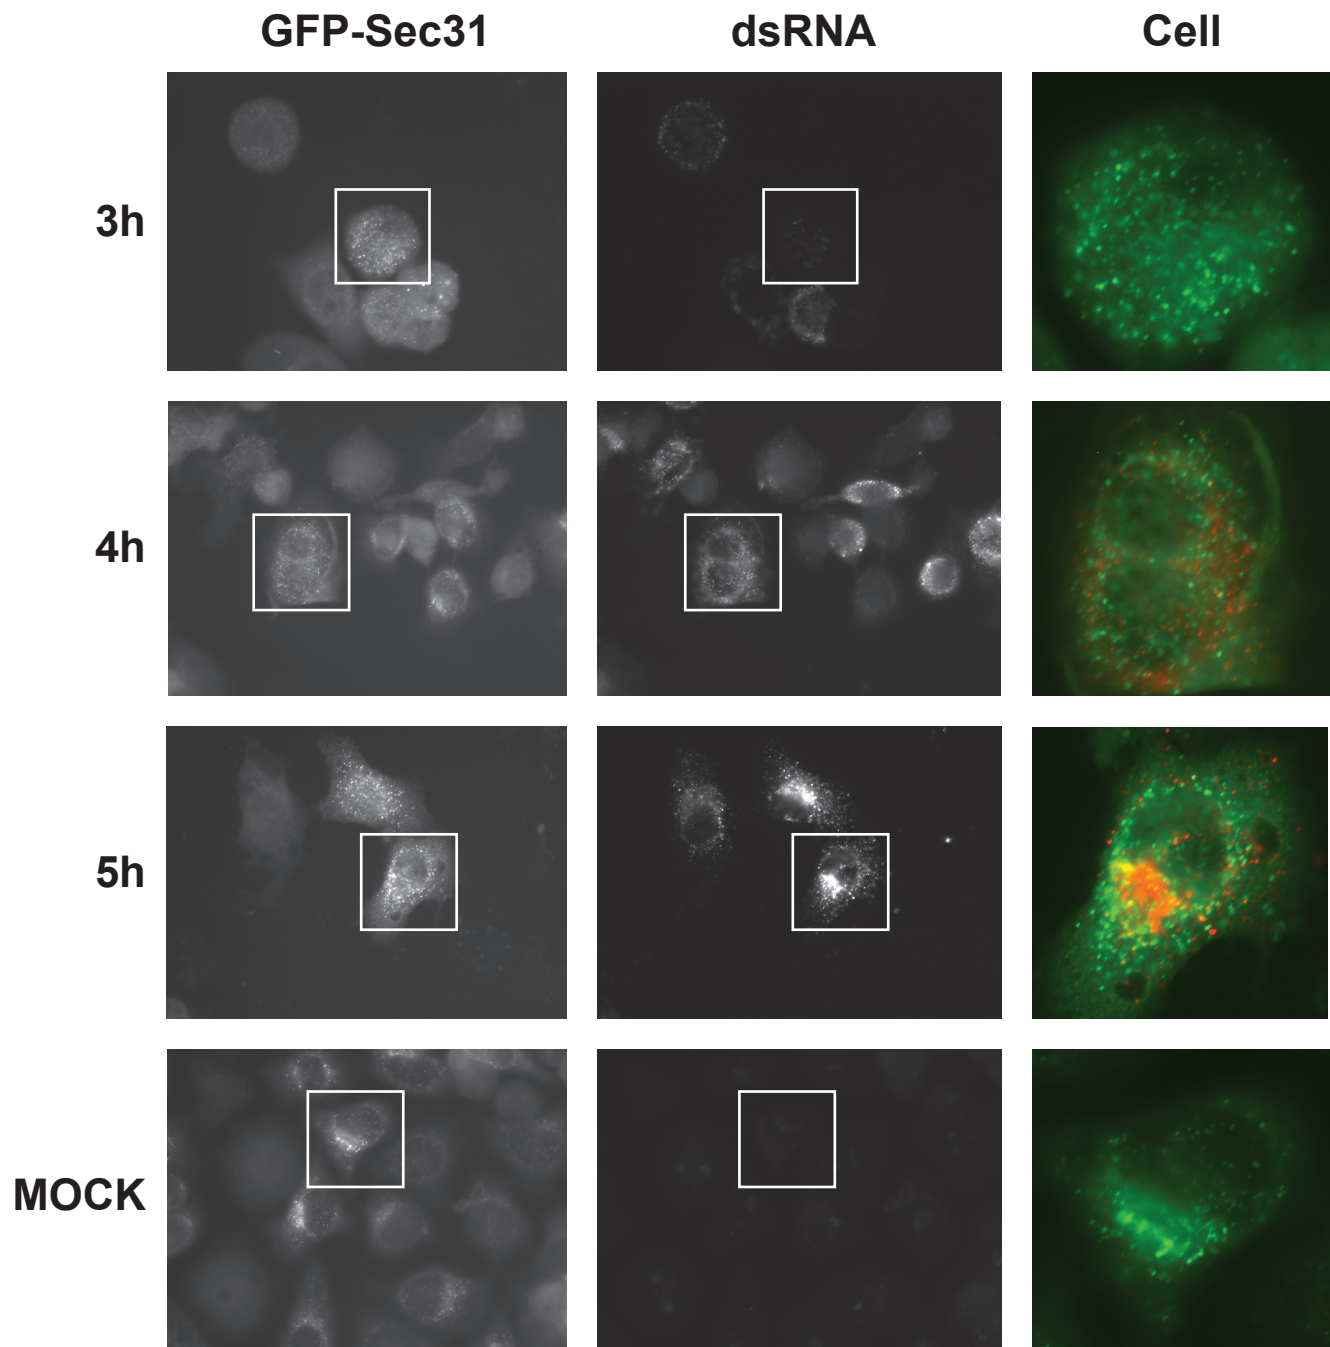

**Figure S4. GFP-Sec31 is not recruited to the sites of poliovirus RNA replication.** H1-Hela cells were transfected with GFP-LC3, and 24 hours later infected at an MOI of 50 pfu/cell, fixed and permeabilized with  $-20^{\circ}\text{C}$  methanol at the indicated times post-infection. Cells were stained using dsRNA antibody for visualization of RNA replication sites.
