# Supplementary material for: Generation of Unique Poliovirus RNA Replication Organelles
Source: PubMed Central journal article supplement — mBio. 2014 Feb 25;5(2):e00833-13. doi: 10.1128/mBio.00833-13 (PMC3940031; doi:10.1128/mbio.00833-13), 2014-02-25
Supplement: mbo001141751sf05.pdf [file mbo001141751sf05.pdf]

Figure S5.

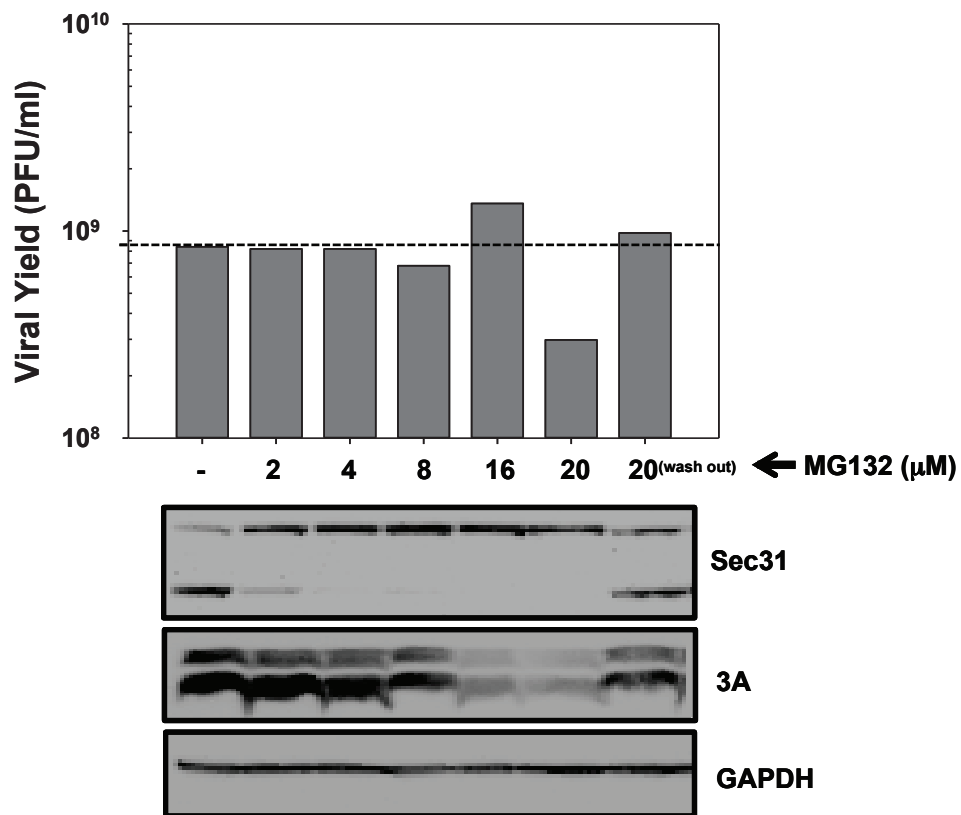

**Figure S5. Effect of MG132 on Sec31 levels during PV infection.** H1-Hela cells were infected at an MOI of 50 pfu/cell. MG132 was used at varying concentrations and added to the media at the time of infection unless otherwise indicated. Western blots were performed for PV-3A, Sec31, and GAPDH.
